# Supplementary material for: Differences in environmental preferences towards cycling for transport among adults: a latent class analysis
Source: PubMed Central journal article supplement (PMC4983031; doi:10.1186/s12889-016-3471-5), 2016-08-12
Supplement: 12889_2016_3471_MOESM1_ESM.pdf [file 12889_2016_3471_MOESM1_ESM.pdf]

## Additional file 1

Table 1.1. Summary of best replications

| Groups | Log-likelihood | Pct Cert | AIC   | CAIC  | BIC   | ABIC  | Chi-Square | Relative Chi-Square |
|--------|----------------|----------|-------|-------|-------|-------|------------|---------------------|
| 2      | -9459          | 41,68    | 18980 | 19260 | 19229 | 19131 | 13522      | 436                 |
| 3      | -9331          | 42,47    | 18755 | 19181 | 19134 | 18985 | 13778      | 293                 |
| 4      | -9245          | 43,00    | 18617 | 19187 | 19124 | 18924 | 13949      | 221                 |

Table 1.2. Tabulation with the comparison between different groups

### Tabulation of 2 group vs. 3 group solutions

|       | 1   | 2   | 3    | Total |
|-------|-----|-----|------|-------|
| 1     | 179 | 593 | 38   | 810   |
| 2     | 53  | 5   | 1082 | 1140  |
| Total | 232 | 598 | 1120 | 1950  |

### Tabulation of 3 group vs. 4 group solutions

|       | 1   | 2   | 3   | 4   | Total |
|-------|-----|-----|-----|-----|-------|
| 1     | 40  | 2   | 2   | 188 | 232   |
| 2     | 362 | 0   | 222 | 14  | 598   |
| 3     | 239 | 868 | 0   | 13  | 1120  |
| Total | 641 | 870 | 224 | 215 | 1950  |

Table 1.3. The distribution in attribute importances for 2, 3 and 4 groups

| <b>Attribute Importances (%) 2 groups</b>              |  |      |      |
|--------------------------------------------------------|--|------|------|
| Type of cycle path                                     |  | 42,5 | 73,8 |
| Speed limits                                           |  | 8,8  | 8,4  |
| Speed bump                                             |  | 1,4  | 2,0  |
| Vegetation                                             |  | 9,6  | 5,2  |
| Evenness of cycle path                                 |  | 12,5 | 4,8  |
| Maintenance                                            |  | 11,9 | 4,1  |
| Traffic density                                        |  | 13,2 | 1,9  |
| The average maximum membership probability is 0.89072. |  |      |      |

| <b>Attribute Importances (%) 3 groups</b>              |      |       |      |
|--------------------------------------------------------|------|-------|------|
| Type of cycle path                                     | 47,8 | 41,41 | 74,3 |
| Speed limits                                           | 24,5 | 2,9   | 6,9  |
| Speed bump                                             | 3,6  | 0,7   | 1,9  |
| Vegetation                                             | 7,5  | 10,7  | 5,5  |
| Evenness of cycle path                                 | 5,7  | 15,1  | 5,1  |
| Maintenance                                            | 4,0  | 14,4  | 4,3  |
| Traffic density                                        | 6,8  | 14,8  | 2,0  |
| The average maximum membership probability is 0.84138. |      |       |      |

| <b>Attribute Importances (%) 4 groups</b>              |      |          |          |          |
|--------------------------------------------------------|------|----------|----------|----------|
| Type of cycle path                                     | 60,8 | 75,81102 | 24,45952 | 48,10116 |
| Speed limits                                           | 3,8  | 8,26820  | 3,75293  | 25,73029 |
| Speed bump                                             | 1,0  | 2,0      | 0,6      | 3,8      |
| Vegetation                                             | 8,8  | 4,6      | 11,7     | 7,2      |
| Evenness of cycle path                                 | 10,9 | 4,2      | 17,7     | 3,9      |
| Maintenance                                            | 8,1  | 3,7      | 19,5     | 4,4      |
| Traffic density                                        | 6,5  | 1,5      | 22,3     | 6,9      |
| The average maximum membership probability is 0.77612. |      |          |          |          |
