# Supplementary material for: Differences in environmental preferences towards cycling for transport among adults: a latent class analysis
Source: PubMed Central journal article supplement (PMC4983031; doi:10.1186/s12889-016-3471-5), 2016-08-12
Supplement: 12889_2016_3471_MOESM2_ESM.pdf [file 12889_2016_3471_MOESM2_ESM.pdf]

## Additional file 2

Table 2.1: The part worth utilities of the environmental levels of each factor separately for each subgroup.

|                                   | Subgroup 1 |         |         | Subgroup 2 |         |         | Subgroup 3 |         |         |
|-----------------------------------|------------|---------|---------|------------|---------|---------|------------|---------|---------|
|                                   | MEAN       | 95% CI- | 95% CI+ | MEAN       | 95% CI- | 95% CI+ | MEAN       | 95% CI- | 95% CI+ |
| <b>Type of cycle path</b>         |            |         |         |            |         |         |            |         |         |
| C1                                | 0.00       | 0.00    | 0.00    | 0.00       | 0.00    | 0.00    | 0.00       | 0.00    | 0.00    |
| C2                                | 6.05       | 5.88    | 6.22    | 7.44       | 7.32    | 7.56    | 10.98      | 10.89   | 11.06   |
| C3                                | 9.10       | 8.93    | 9.26    | 8.34       | 8.25    | 8.43    | 16.09      | 16.04   | 16.15   |
| C4                                | 13.27      | 13.01   | 13.53   | 8.83       | 8.71    | 8.95    | 24.72      | 24.64   | 24.80   |
| C5                                | 10.51      | 10.37   | 10.65   | 8.68       | 8.58    | 8.79    | 18.50      | 18.46   | 18.55   |
| C6                                | 12.83      | 12.62   | 13.03   | 9.25       | 9.02    | 9.48    | 25.73      | 25.68   | 25.78   |
| <b>Speed limits</b>               |            |         |         |            |         |         |            |         |         |
| 50 km/h                           | 0.00       | 0.00    | 0.00    | 0.00       | 0.00    | 0.00    | 0.00       | 0.00    | 0.00    |
| 30 km/h                           | 8.18       | 8.05    | 8.32    | 0.64       | 0.56    | 0.73    | 2.50       | 2.44    | 2.55    |
| <b>Speedbump</b>                  |            |         |         |            |         |         |            |         |         |
| absent                            | 0.00       | 0.00    | 0.00    | 0.00       | 0.00    | 0.00    | 0.00       | 0.00    | 0.00    |
| present                           | 1.17       | 1.01    | 1.32    | 0.15       | 0.08    | 0.22    | 0.60       | 0.55    | 0.65    |
| <b>Vegetation</b>                 |            |         |         |            |         |         |            |         |         |
| no trees                          | 0.00       | 0.00    | 0.00    | 0.00       | 0.00    | 0.00    | 0.00       | 0.00    | 0.00    |
| two trees                         | 2.10       | 1.98    | 2.23    | 1.63       | 1.55    | 1.72    | 1.23       | 1.19    | 1.27    |
| four trees                        | 1.35       | 1.17    | 1.52    | 2.18       | 2.01    | 2.34    | 1.94       | 1.87    | 2.01    |
| <b>Evenness of the cycle path</b> |            |         |         |            |         |         |            |         |         |
| very uneven                       | 0.00       | 0.00    | 0.00    | 0.00       | 0.00    | 0.00    | 0.00       | 0.00    | 0.00    |
| moderately uneven                 | -0.74      | -0.94   | -0.54   | 0.96       | 0.83    | 1.09    | 0.62       | 0.57    | 0.66    |
| even                              | 0.90       | 0.62    | 1.18    | 3.37       | 3.21    | 3.52    | 1.76       | 1.71    | 1.82    |
| <b>Maintenance</b>                |            |         |         |            |         |         |            |         |         |
| bad maintenance                   | 0.00       | 0.00    | 0.00    | 0.00       | 0.00    | 0.00    | 0.00       | 0.00    | 0.00    |
| moderate maintenance              | 0.57       | 0.39    | 0.74    | 2.24       | 2.16    | 2.33    | 0.90       | 0.87    | 0.94    |
| good maintenance                  | 0.73       | 0.57    | 0.88    | 3.20       | 3.03    | 3.38    | 1.41       | 1.35    | 1.48    |
| <b>Traffic density</b>            |            |         |         |            |         |         |            |         |         |
| 4 cars + truck                    | 0.00       | 0.00    | 0.00    | 0.00       | 0.00    | 0.00    | 0.00       | 0.00    | 0.00    |
| 3 cars                            | 1.15       | 0.93    | 1.37    | 2.23       | 2.12    | 2.33    | 0.12       | 0.08    | 0.16    |
| 1 car                             | 1.69       | 1.44    | 1.95    | 3.45       | 3.25    | 3.65    | 0.78       | 0.72    | 0.84    |

C1: no cycle path; C2: cycle path separated from traffic by marked white lines; C3: cycle path separated from traffic with a curb, not separated from walking path by color; C4: cycle path separated from traffic with a hedge, not separated from walking path by color; C5: cycle path separated from traffic with a curb, separated from walking path by color; C6: cycle path separated from traffic with a hedge, separated from walking path by color.
